# Supplementary material
Source: PubMed Central journal article supplement (PMC9248222)
Supplement: mmc1.pdf [file mmc1.pdf]

# The Right Ventricular-Pulmonary Arterial Coupling and Diastolic Function Response to Therapy in Pulmonary Arterial Hypertension

*Rebecca R. Vanderpool, PhD; Kendall S. Hunter, PhD; Michael Insel, MD; Joe G.N. Garcia, MD; Edward J. Bedrick, PhD; Ryan J. Tedford, MD; and Franz P. Rischard, DO*

CHEST 2022; 161(4):1048-1059

*Online supplements are not copyedited prior to posting and the author(s) take full responsibility for the accuracy of all data.*

© 2022 AMERICAN COLLEGE OF CHEST PHYSICIANS. Reproduction of this article is prohibited without written permission from the American College of Chest Physicians. See online for more details. DOI: 10.1016/j.chest.2021.09.040

| Variable                   |                                 | Non-Responders      | Responders  |                   |                    |
|----------------------------|---------------------------------|---------------------|-------------|-------------------|--------------------|
|                            |                                 |                     | All         | Super-responders  | Partial Responders |
| Age (yr)                   |                                 | 57±19               | 53 ± 13     | <b>48 ± 11†</b>   | 59 ± 12            |
| Sex (Female)               |                                 | 7 (78)              | 34 (79)     | 18 (81)           | 16 (76)            |
| BMI (kg/m <sup>2</sup> )   |                                 | 34.1 ± 14.1         | 30.0 ± 6.7  | 29.8 ± 5.2        | 30.3 ± 8.0         |
| WSPH Category              | CTD                             | 2 (22.2)            | 10 (2.3)    | 3 (13.6)          | 7 (33.3)           |
|                            | Drugs/Toxins                    | 2 (22.2)            | 6 (23.3)    | 5 (22.7)          | 1 (4.8)            |
|                            | HIV                             | 0 (0.0)             | 1 (14.0)    | 1 (4.5)           | 0 (0)              |
|                            | iPAH                            | 4 (44.4)            | 21 (2.3)    | 10 (45.5)         | 11 (52.4)          |
|                            | Portal Hypertension             | 0 (0.0)             | 4 (48.8)    | 2 (9.1)           | 2 (9.5)            |
|                            | PVOD                            | 1 (11.1)            | 0 (9.3)     | 0 (0)             | 0 (0)              |
| Diabetes                   | Diabetes                        | 0 (0.0)             | 1 (2.3)     | 1 (4.5)           | 0 (0)              |
| BNP                        | BNP (pg/mL)                     | <b>1278 ± 1170*</b> | 604.1 ± 476 | 481.9 ± 444       | 732.2 ± 485        |
| 6 Minute Walk Distance (M) |                                 | <b>152 ± 124*</b>   | 298 ± 91    | 328 ± 91          | 254 ± 75           |
| Risk Scores                | ERS Low Risk                    | 0 (0)               | 1 (2.3)     | 1 (4.5)           | 0 (0)              |
|                            | ERS Intermediate Risk           | 0 (0)               | 24 (55.8)   | 14 (63.6)         | 10 (47.6)          |
|                            | ERS High Risk                   | 9 (100)             | 18 (41.9)   | 7 (31.8)          | 11 (52.4)          |
|                            | REVEAL Risk Score               | 11.9 ± 0.8          | 9.6 ± 1.5   | 9.3 ± 1.5         | 9.9 ± 1.4          |
|                            | REVEAL 2 Risk Score             | 11.0 ± 0.5          | 10.0 ± 2.1  | <b>9.2 ± 1.5†</b> | 10.9 ± 2.3         |
| Hemodynamics               | Mean PAP (mmHg)                 | 58.4 ± 14           | 55.4 ± 10.3 | 55.6 ± 11.4       | 55.1 ± 9.3         |
|                            | Cardiac Output (L/min)          | 3.7 ± 1.5           | 4.1 ± 1.3   | 4.1 ± 1.2         | 4.1 ± 1.4          |
|                            | PCWP (mmHg)                     | 9.1 ± 4.1           | 8.6 ± 4.6   | 8.6 ± 4.0         | 9.7 ± 4.2          |
|                            | RAP (mmHg)                      | 13 ± 7              | 12 ± 7      | 11 ± 5            | 14 ± 7             |
|                            | PVR (WU)                        | 15.7 ± 7.8          | 12.1 ± 4.2  | 12.5 ± 4.4        | 11.8 ± 4.0         |
|                            | Compliance (mL/mmHg)            | 0.8 ± 0.4           | 1.1 ± 0.4   | 1.0 ± 0.4         | 1.1 ± 0.4          |
|                            | PAO2 sat (%)                    | <b>52 ± 12*</b>     | 60.4 ± 8.3  | 60 ± 9.0          | 62 ± 7.5           |
| Cardiac Imaging            | Echo RA area (cm <sup>2</sup> ) | 27.7 ± 5.2          | 20.0 ± 3.8  | 17.3              | 22.7               |
|                            | Echo TAPSE (cm)                 | 1.43 ± 0.41         | 1.45 ± 0.38 | 1.45 ± 0.4        | 1.46 ± 0.4         |
|                            | Echo FAC (%)                    | 15.7 ± 9.4          | 20.1 ± 8.2  | 22.3 ± 7.2        | 17.8 ± 6.6         |
|                            | MRI RVESVi (mL/m <sup>2</sup> ) |                     | 87.5 ± 43.7 | 79.4 ± 22.2       | 96.4 ± 60.8        |

|                                      |                                              |                   |              |                    |              |
|--------------------------------------|----------------------------------------------|-------------------|--------------|--------------------|--------------|
|                                      | MRI RVEDVi (mL/m <sup>2</sup> )              |                   | 116.2 ± 44.6 | 110.4 ± 26.2       | 122.8 ± 59.4 |
|                                      | MRI RVEF (%)                                 |                   | 26.2 ± 10.3  | <b>23.8 ± 7.2†</b> | 19.0 ± 8.06  |
|                                      | MRI SV/ESV                                   |                   | 0.39 ± 0.23  | 0.43 ± 0.2         | 0.34 ± 0.1   |
|                                      | MRI RV mass (gm/m <sup>2</sup> )             |                   | 45.0 ± 18.5  | 41.4 ± 12.5        | 48.9 ± 23.0  |
|                                      | RV Mass/Volume (gm/mL)                       |                   | 0.4 ± 0.11   | 0.4 ± 0.12         | 0.4 ± 0.10   |
| RVPA Coupling and Diastolic Function | Right ventricular elastance, (Ees) (mmHg/mL) | 1.5 ± 1.1         | 1.5 ± 0.7    | 1.6 ± 0.7          | 1.4 ± 0.7    |
|                                      | Arterial elastance (Ea) (mmHg/mL)            | <b>2.8 ± 1.8*</b> | 1.9 ± 0.7    | 1.9 ± 0.8          | 1.8 ± 0.6    |
|                                      | RVPA coupling ratio                          | 0.6 ± 0.4         | 0.9 ± 0.4    | 0.9 ± 0.4          | 0.8 ± 0.4    |
|                                      | RV end-diastolic elastance (mmHg/mL)         |                   | 1.2 ± 0.7    | 1.4 ± 0.8          | 1.1 ± 0.6    |
|                                      | Eed <sub>corrected</sub>                     |                   | 3.4 ± 2.1    | 3.8 ± 2.1          | 2.9 ± 2.0    |

**e-Table 1. Baseline demographics and clinical data, multiparametric risk scores, resting hemodynamics, cardiac imaging, and coupling/diastolic function by therapeutic response.** Therapeutic response is classified by follow up 1 (responders versus non-responders) and at follow-up 2 (super-responders and partial-responders). Baseline two-group comparisons were done with unpaired, two-tailed t tests for continuous variables or Pearson's chi-square test for categorical variables. See Table 1 of the main manuscript for abbreviations. \*p<0.05 for non-responders versus responders; † p<0.05 for super-responders versus partial-responders. Data are represented by N (%) or mean ± SD.

| Variable                |                                       | Super-responders<br>N=23 | Partial responders<br>N=20 |
|-------------------------|---------------------------------------|--------------------------|----------------------------|
| Risk Score (s)          | ERS Low Risk                          | 8 (36)                   | 0 (0)                      |
|                         | ERS Intermediate Risk                 | 14 (64)                  | 19 (91)                    |
|                         | ERS High Risk                         | 0 (0)                    | 2 (9)                      |
| ERS Risk Score Elements | Functional Class                      |                          |                            |
|                         | II                                    | 8 (36)                   | 0 (0)                      |
|                         | III                                   | 14 (64)                  | 18 (86)                    |
|                         | IV                                    | 0 (0)                    | 3 (14)                     |
|                         | 6 MWD (m)                             | <b>409 ± 115*</b>        | 281 ± 95                   |
|                         | BNP (pg/mL)                           | 169 ± 179                | 276 ± 95                   |
|                         | RAP (mmHg)                            | 5 ± 4                    | 7 ± 5                      |
|                         | Cardiac Index (L/min/m <sup>2</sup> ) | 3.1 ± 0.8                | 2.7 ± 0.8                  |
|                         | PA O <sub>2</sub> sat (%)             | 66.5 ± 7.4               | 64 ± 6.3                   |
| Treatment               | Treprostinil Dose                     | 46.1 ± 6.8               | 42.6 ± 11.1                |
|                         | Diuretics (Loop)                      | 16 (73)                  | 18 (86)                    |
|                         | Diuretics (Combination)               | 5 (23)                   | 8 (38)                     |
| Hemodynamics            | mPAP (mmHg)                           | 44.8 ± 11.0              | 46.0 ± 8.4                 |
|                         | PCWP                                  | 6.3 ± 3.1                | 7.3 ± 4.1                  |
|                         | PVR (WU)                              | 7.4 ± 3.2                | 8.1 ± 2.8                  |
|                         | Compliance (mL/mmHg)                  | 1.8 ± 0.8                | 1.5 ± 0.5                  |
| Cardiac Imaging         | RA area (cm <sup>2</sup> )            | 22.8 ± 5.0               | 25.6 ± 8.2                 |
|                         | TAPSE (cm)                            | 2.7 ± 3.3                | 1.7 ± 0.43                 |
|                         | FAC (%)                               | 24.7 ± 9.3               | 23 ± 10.0                  |
|                         | RV ESVi (mL/m <sup>2</sup> )          | 70.4 ± 25.3              | 90.7 ± 58.7                |
|                         | RV EDVi (mL/m <sup>2</sup> )          | 104 ± 29.4               | 123 ± 60.5                 |
|                         | RVEF (%)                              | 33.0 ± 9.2               | 30.4 ± 11.0                |
|                         | SV/ESV                                | 0.52 ± 0.2               | 0.47 ± 0.3                 |
|                         | MRI RV mass (gm/m <sup>2</sup> )      | 42.1 ± 12.5              | 51.5 ± 25.3                |
|                         | RV Mass/Volume (gm/mL)                | 0.44 ± 0.16              | 0.41 ± 0.10                |
| RVPA Coupling           | Ees (mL/mmHg)                         | 1.1 ± 0.6                | 1.4 ± 0.8                  |
|                         | Ea (mL/mmHg)                          | 1.2 ± 0.5                | 1.3 ± 0.5                  |
|                         | Ees/Ea                                | 1.1 ± 0.5                | 1.1 ± 0.5                  |
|                         | Eed (mL/mmHg)                         | 0.7 ± 0.5                | 0.9 ± 0.6                  |
|                         | Eed <sub>corrected</sub>              | 1.8 ± 1.4                | 2.18 ± 1.41                |

**e-Table 2. Follow Up 1 Demographics and clinical data, multiparametric risk scores, resting hemodynamics, cardiac imaging, and coupling/diastolic function classified therapeutic response at follow up 2.** Therapeutic response is classified by achievement of ERS risk score 1 (low risk) as super-responders or ERS risk score 2/3 (intermediate or high risk) at follow up 2. See Table 1 of the main manuscript for abbreviations. Two-group comparisons were done with unpaired, two-tailed t tests for continuous variables or Pearson's chi-square test for categorical variables. \* p<0.05 for super-responders versus partial-responders. Data are represented by N (%) or mean ± SD.

| Variable                              |                                  | Super-responders<br>N=23 | Partial responders<br>N=20 |
|---------------------------------------|----------------------------------|--------------------------|----------------------------|
| Risk Score (s)                        | ERS Low Risk                     | 22 (100)                 | 0 (0)                      |
|                                       | ERS Intermediate Risk            | 0 (0)                    | 18 (90%)                   |
|                                       | ERS High Risk                    | 0 (0)                    | 2 (10)                     |
| ERS Risk Score Elements               | Functional Class                 |                          |                            |
|                                       | II                               | <b>17 (36)</b>           | 2 (10)                     |
|                                       | III                              | 4 (64)                   | 17 (85)                    |
|                                       | IV                               | 0 (0)                    | 1 (5)                      |
|                                       | 6 MWD (m)                        | <b>449 ± 107*</b>        | 314 ± 115                  |
|                                       | BNP (pg/mL)                      | <b>38.4 ± 28.6*</b>      | 191.0 ± 157.2              |
|                                       | RAP (mmHg)                       | 3 ± 2                    | <b>7 ± 5</b>               |
| Cardiac Index (L/min/m <sup>2</sup> ) | 3.0 ± 0.5                        | 2.7 ± 0.6                |                            |
| PA O <sub>2</sub> sat (%)             | <b>70.5 ± 5.0*</b>               | 62.0 ± 6.8               |                            |
| Treatment                             | Treprostinil Dose (ng/kg/min)    | 64.5 ± 20.1              | 66.4 ± 19.1                |
|                                       | Combination Therapy?             | 17 (74)                  | 20 (100)                   |
|                                       | Diuretics (Loop)                 | 16 (72)                  | 18 (90)                    |
|                                       | Diuretics (Combination)          | 5 (23)                   | 8 (40)                     |
| Hemodynamics                          | mPAP (mmHg)                      | <b>35.3 ± 8.5*</b>       | 43.2 ± 8.7                 |
|                                       | PCWP                             | 6.6 ± 2.5                | 7.5 ± 3.4                  |
|                                       | PVR (WU)                         | <b>5.5 ± 1.9*</b>        | 7.3 ± 2.7                  |
|                                       | Compliance (mL/mmHg)             | <b>2.4 ± 1.0*</b>        | 1.6 ± 0.5                  |
| Cardiac Imaging                       | RA area (cm <sup>2</sup> )       | <b>20.6 ± 5.1*</b>       | 28.8 ± 10.0                |
|                                       | TAPSE (cm)                       | 2.1 ± 0.34               | 1.9 ± 0.5                  |
|                                       | FAC (%)                          | 27.3 ± 11.2              | 19.7 ± 9.6                 |
|                                       | RV ESVi (mL/m <sup>2</sup> )     | <b>57.3 ± 18.0*</b>      | 104.0 ± 73.4               |
|                                       | RV EDVi (mL/m <sup>2</sup> )     | 98.3 ± 29.5              | 141.5 ± 6.3                |
|                                       | RVEF (%)                         | <b>42.0 ± 5.1*</b>       | 28.7 ± 10.0                |
|                                       | SV/ESV                           | <b>0.73 ± 0.2*</b>       | 0.43 ± 0.21                |
|                                       | MRI RV mass (gm/m <sup>2</sup> ) | 39.8 ± 7.9               | 55.0 ± 50.7                |
| RV Mass/Volume (gm/mL)                | 0.43 ± 0.16                      | 0.37 ± 0.14              |                            |
| RVPA Coupling                         | Ees (mL/mmHg)                    | 1.2 ± 1.0                | 1.2 ± 0.7                  |
|                                       | Ea (mL/mmHg)                     | <b>0.8 ± 0.2*</b>        | 1.2 ± 0.4                  |
|                                       | Ees/Ea                           | 1.5 ± 0.9                | 1.0 ± 0.5                  |
|                                       | Eed (mL/mmHg)                    | <b>0.6 ± 0.3*</b>        | 0.9 ± 0.4                  |
|                                       | Eed <sub>corrected</sub>         | <b>1.6 ± 0.95*</b>       | 3.2 ± 2.0                  |

**e-Table 3. Follow Up 2 Demographics and clinical data, multiparametric risk scores, resting hemodynamics, cardiac imaging, and coupling/diastolic function classified therapeutic response at follow up 2.** Therapeutic response is classified by achievement of ERS risk score 1 (low risk) as super-responders or ERS risk score 2/3 (intermediate or high risk) at follow up 2. See Table 1 of the main manuscript for abbreviations. Two-group comparisons were done with unpaired, two-tailed t tests for continuous variables or Pearson's chi-square test for categorical variables. See table S2 for abbreviations. \* p<0.05 for super-responders versus partial-responders. Data are represented by N (%) or mean ± SD.

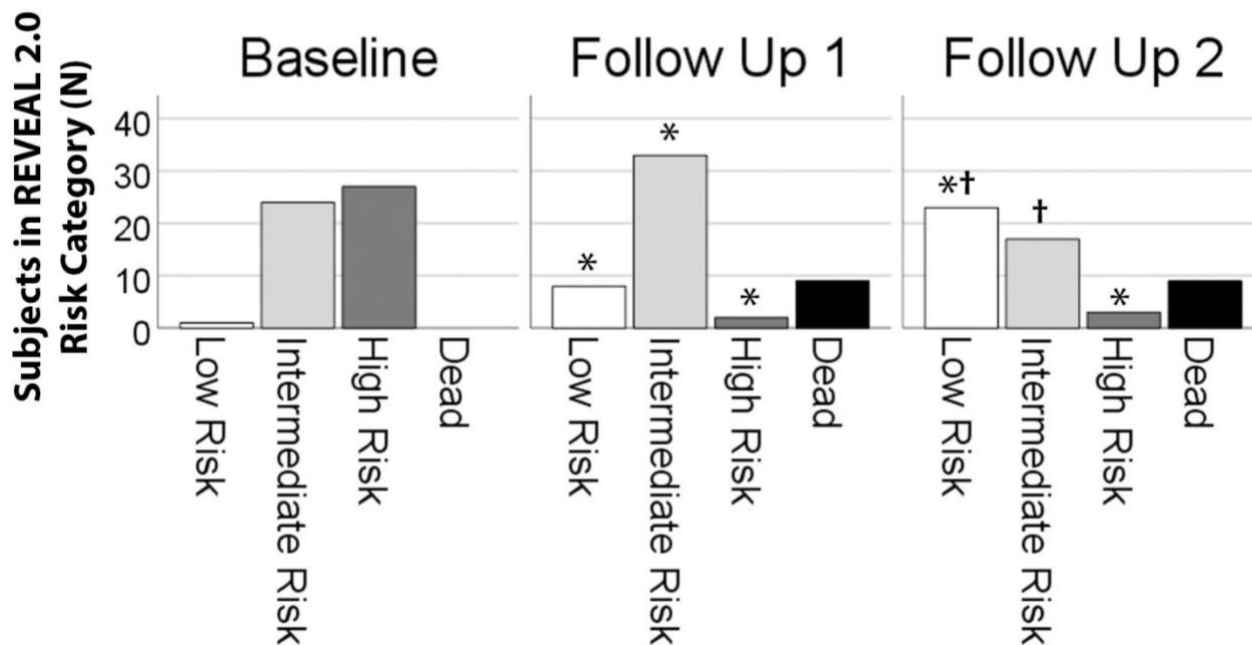

**e-Figure 1. Therapeutic changes in REVEAL 2.0 risk score.** There is an improvement from high and intermediate risk at baseline to low and intermediate risk at follow-up 1. Subjects dead before follow-up 1 were non-responders with irreversible RV failure. Patients in low risk continued at follow-up 2 indicating further improvement. Changes are like ERS risk score changes. REVEAL within group differences tested with Person’s chi-square test. \* P<0.05 versus baseline; † P<0.05 versus follow up 1

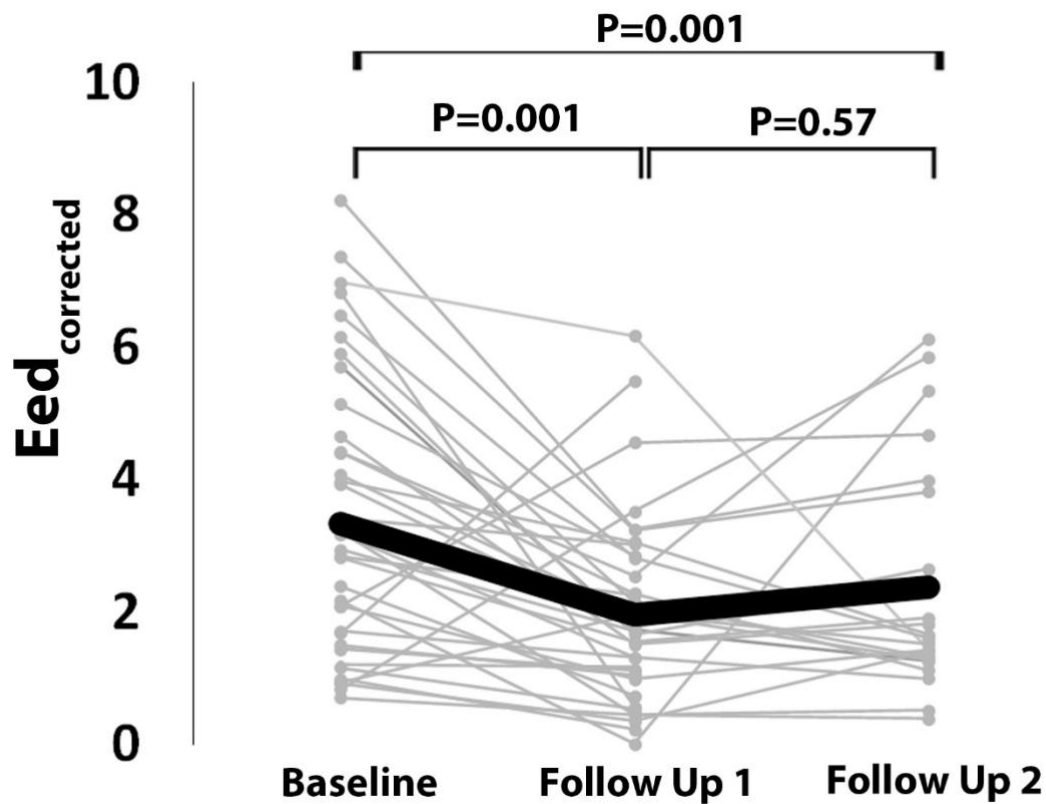

**e-Figure 2. Figure 4. Longitudinal Assessment of  $E_{ed\_corrected}$  among treatment responders.** Spaghetti plots demonstrating changes in  $E_{ed\_corrected}$  for RV mass/volume (relative wall thickness) over time.  $E_{ed\_corrected}$  tested with repeated measures ANOVA. Large bracket indicates overall model P-value; small brackets indicate pairwise comparisons.

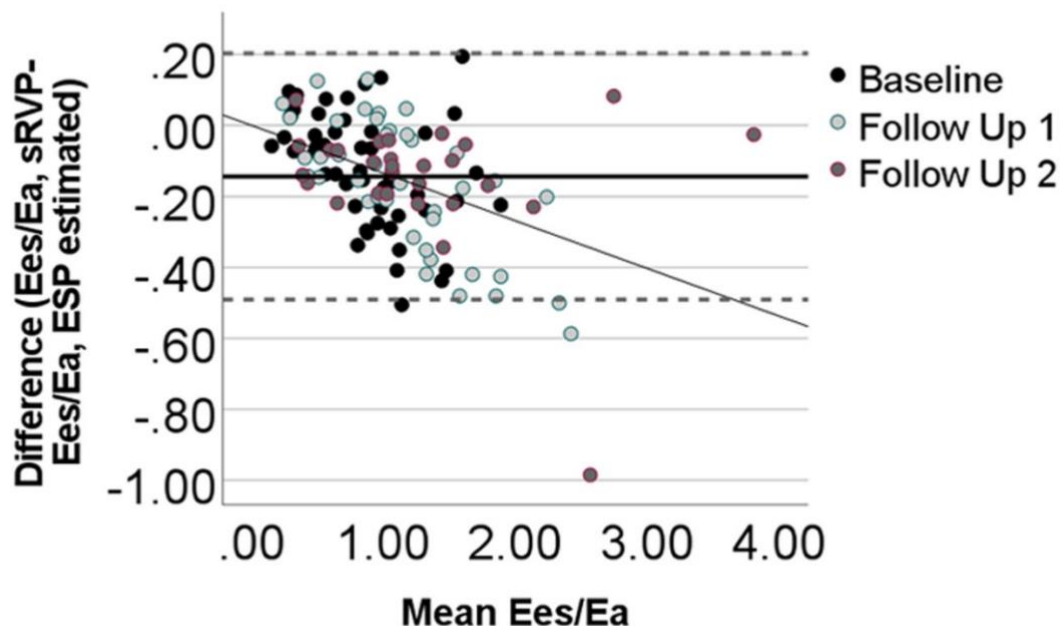

**e-Figure 3. Accuracy and precision of Ees/Ea based on two methods of estimation of end-systolic pressure.** Bland-Altman plot representing the accuracy of Ees/Ea calculated from ESP estimated from systolic right ventricular pressure (sRVP) versus mean pulmonary artery pressure (mPAP). There is considerable bias -0.143 which was proportional (beta -0.13,  $p < 0.0001$  for this relationship). Limits of agreement were also large 0.18 to -0.49. Ees/Ea and Eed tested with repeated measures ANOVA..
